# Supplementary material
Source: HighWire-hosted journal article supplement (https://emj.bmj.com/content/39/9/691)

## Appendix

### e-Tables

e-Table 1. Netherlands Triage System urgency scores, clinical meaning, and desired response.

| NTS score | Condition                                | Response            |
|-----------|------------------------------------------|---------------------|
| <b>U0</b> | failure ABCD - resuscitation             | Resuscitation (CPR) |
| <b>U1</b> | unstable ABCD – immediate danger to life | Immediate           |
| <b>U2</b> | threatened ABCD or organ damage          | As soon as possible |
| <b>U3</b> | real chance of harm / humane reasons     | Within a few hours  |
| <b>U4</b> | negligible risk of damage                | Within 24 hours     |
| <b>U5</b> | no chance of damage                      | Next workday        |

e-Table 2. Modified Early Warning Scores as used in the VU university medical center .

| Score                                       | 3                                    | 2      | 1         | 0                                   | 1       | 2                | 3    |
|---------------------------------------------|--------------------------------------|--------|-----------|-------------------------------------|---------|------------------|------|
| Respiration rate                            |                                      | < 9    |           | 9-14                                | 15-20   | 21-30            | >40  |
| Peripheral oxygen saturation (with therapy) | < 90                                 |        |           |                                     |         |                  |      |
| Heart rate                                  |                                      | < 40   | 40-50     | 51-100                              | 101-110 | 111-130          | >130 |
| Systolic blood pressure                     | < 70                                 | 70-80  | 81-100    | 101-200                             |         |                  |      |
| Temperature                                 |                                      | < 35.1 | 35.1-36.5 | 36.5- 37.5                          | >37.5   |                  |      |
| Consciousness                               |                                      |        |           | A                                   | V       | P                | U    |
| Urine production                            | < 75 mL in the last 4 hours: 1 point |        |           |                                     |         |                  |      |
| Nurse being worried                         | 1 point                              |        |           |                                     |         |                  |      |
| A = Alert                                   | V = Response to verbal stimulation   |        |           | P = Response to painful stimulation |         | U = Unresponsive |      |

## e-Figures

e-Figure 1. A bar chart of the absolute counts of the various Netherlands Triage System (NTS) scores complete population, before exclusion of patients without documented Modified Early Warning Scores (MEWS).

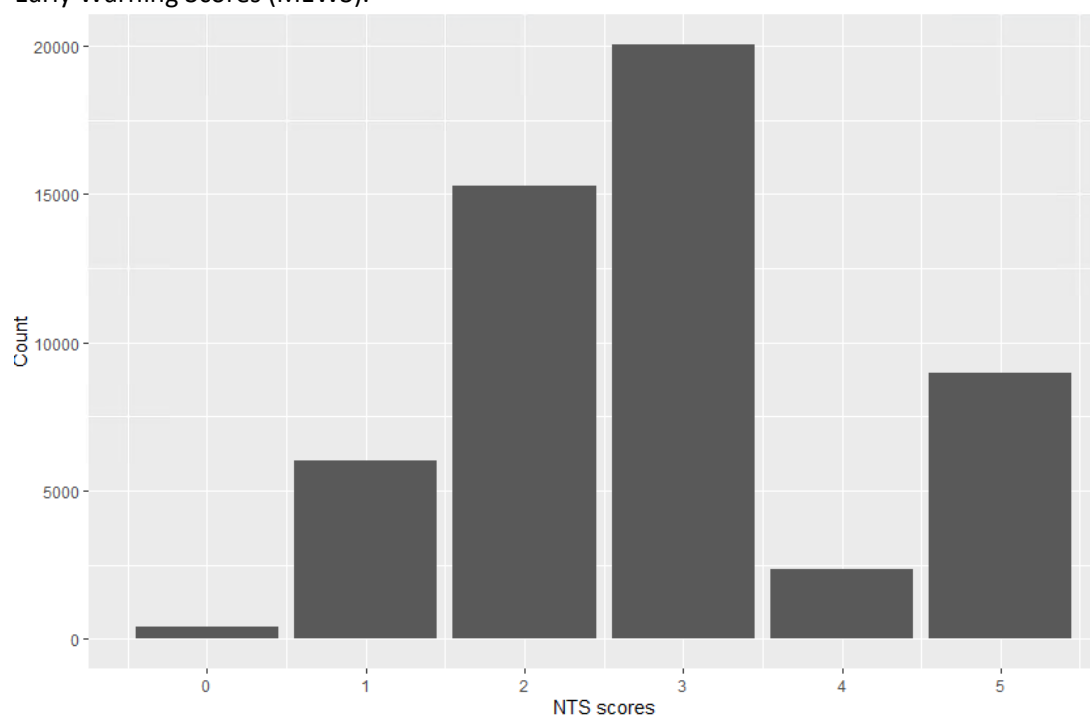

Supplement: inline-supplementary-material-1 [file inline-supplementary-material-1.pdf]
